# Supplementary material
Source: HighWire-hosted journal article supplement (http://gut.bmjjournals.com/highwire/filestream/192543/field_highwire_adjunct_files/1/Supporting_material_S2.pdf)

**S2** - Translocation of Crohn's disease *E. coli* HM605 and control *E. coli* (data not shown) across (A) M-cell and (B) Caco2-cl1 cell monolayers was independent of trans-epithelial electrical resistance (TEER), when TEER  $\geq 300 \Omega \cdot \text{cm}^2$  (n=66 and 61 wells respectively).

**A**

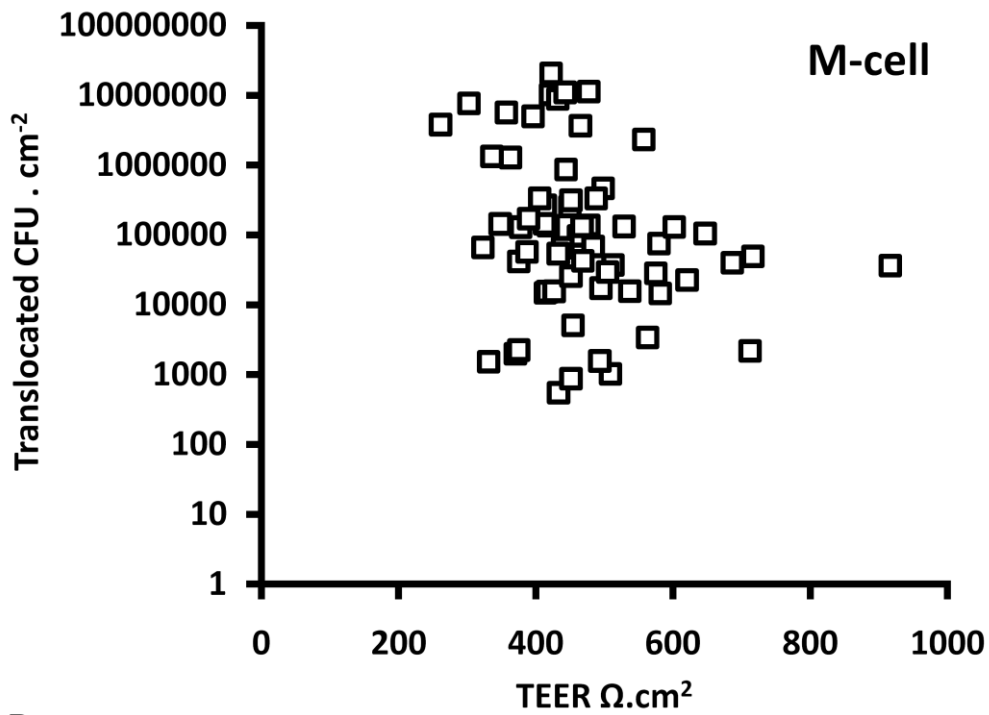

**B**

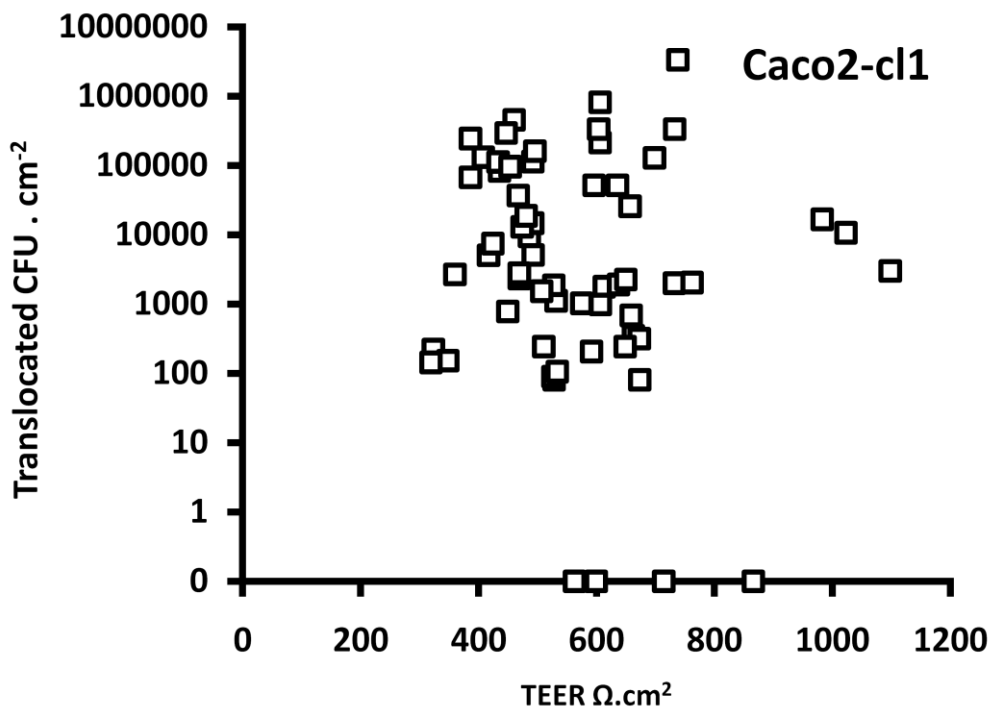

Supplement: Supporting_material_S2.pdf [file Supporting_material_S2.pdf]
